# Supplementary material for: Toward a detoxification fabric against nerve gas agents: guanidine-functionalized poly[2-(3-butenyl)-2-oxazoline]/Nylon-6,6 nanofibers
Source: Royal Society of Chemistry journal article supplement (doi:10.1039/c7ra01278k), 2017-01-01
Supplement: c7ra01278k1.pdf [file c7ra01278k1.pdf]

# **Toward Detoxification Fabric against Nerve Gas Agents: Guanidine-Functionalized Poly[2-(3-butenyl)-2- oxazoline]/Nylon-6,6 Nanofibers**

Wu Bin Ying<sup>a,†</sup>, Sohee Kim<sup>a,†</sup>, Min Woo Lee<sup>a</sup>, Na Yeong Go<sup>a</sup>, Hyunsook Jung<sup>b</sup>, Sam Gon Ryu<sup>b</sup>,  
Bumjae Lee<sup>a,\*</sup>, Kyung Jin Lee<sup>a,\*</sup>

*Department of fine chemical engineering and applied chemistry, College of  
Engineering, Chungnam National University, 99 Daehak-ro (st), Yuseong-gu,  
Daejeon, 305-764, Korea*

\* Corresponding author. Tel.: +82 42 821 7009; fax: +82 42 822 7009.

E-mail addresses: kjlee@cnu.ac.kr

\* Corresponding author. Tel.: +82 42 821 6696; fax: +82 42 822 6046.

E-mail addresses: bjlee@cnu.ac.kr

<sup>†</sup> These authors contributed equally to this work.

## Content

### 1. Schemes

**Scheme S1.** 2-(3-Butenyl)-2-oxazoline (BuOxz) monomer synthesis

### 2. Figures

**Figure S1.**  $^1\text{H}$ -NMR spectrum of 2-(3-butenyl)-oxazoline

**Figure S2.**  $^{31}\text{P}$ -NMR spectrum of DFP in the presence of G-PBuOxz/Nylon-6,6 fiber co-electrospun in formic acid,  $[\text{Guanidine}]/[\text{DFP}] = 10/1$

**Figure S3.**  $^{31}\text{P}$ -NMR spectra of decontamination of DFP (**A**) with nothing only DFP; (**B**) with G-PBuOxz/Nylon-6,6 fiber without water; (**C**) with water without G-PBuOxz/Nylon-6,6 fiber for 2 hours.

## 1. Schemes

### Scheme S1. BuOxz monomer synthesis

1) 4-pentenoic acid (PA) + N-hydroxysuccinimide (HS) → N-succinimidyl-4-pentenate (SP)

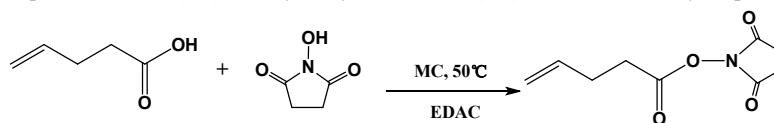

2) N-succinimidyl-4-pentenate (SP) + 2-chloroethylamine (CE) → N-(2-chloroethyl)-4-pentenamide (CP)

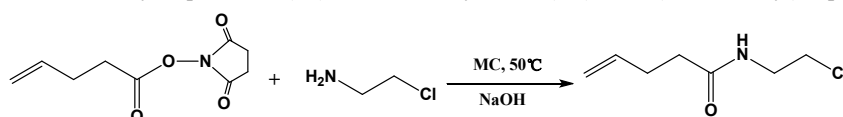

3) N-(2-chloroethyl)-4-pentenamide (CP) + potassium hydroxide → 2-(3-butenyl)-2-oxazoline (BuOxz)

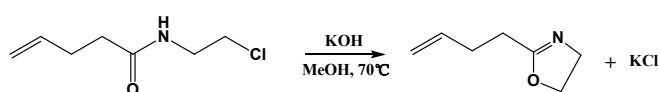

## 2. Figures

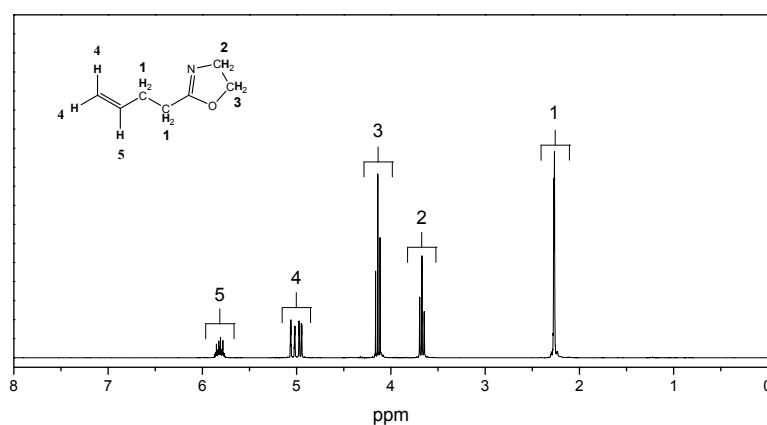

**Figure S1.** <sup>1</sup>H-NMR spectrum of 2-(3-butenyl)-oxazoline

BuOxz has been synthesized successfully after analyzed by <sup>1</sup>H-NMR spectroscopy as shown in **Figure S1**. The intensity ratio of N-(2-chloroethyl)-4-pentenamide was P1: P2 : P3: P4 : P5 = 3.8 : 2.0 : 1.9 : 2.0 : 1.1, which was consistent with the theoretical value of 4 : 2 : 2 : 2 : 1.

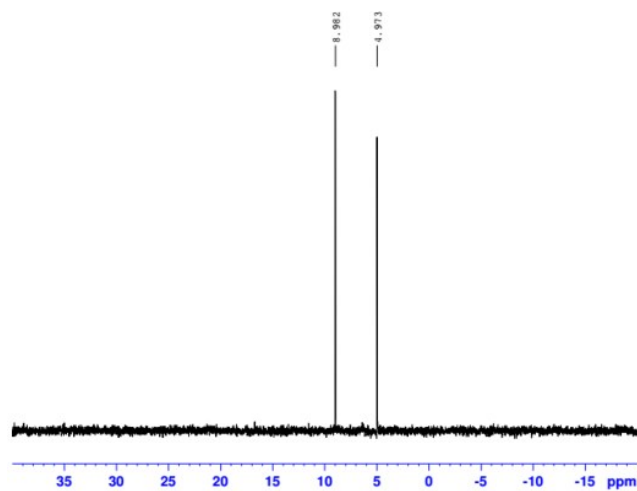

**Figure S2.**  $^{31}\text{P}$ -NMR spectrum of DFP in the presence of G-PBuOxz/Nylon-6,6 fiber co-electrospun in formic acid,  $[\text{Guanidine}]/[\text{DFP}] = 10/1$

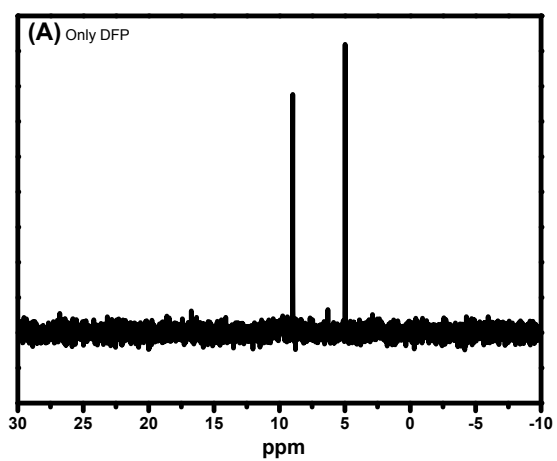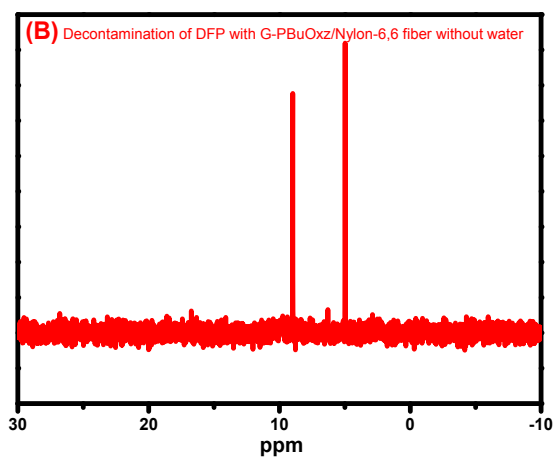

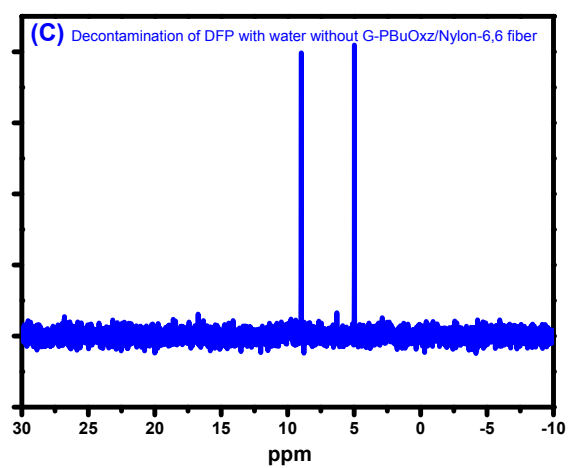

**Figure S3.**  $^{31}\text{P}$ -NMR spectra of decontamination of DFP (A) with nothing only DFP; (B) with G-PBuOxz/Nylon-6,6 fiber without water; (C) with water without G-PBuOxz/Nylon-6,6 fiber for 2 hours.
